# Supplementary material for: The amyloid interactome: Exploring protein aggregation
Source: PubMed Central journal article supplement (PMC5383009; doi:10.1371/journal.pone.0173163), 2017-03-01
Supplement: pone.0173163.s005.pdf [file pone.0173163.s005.pdf]

**S1 Table. The non-redundant, detailed catalogue of *in vivo* and *in vitro* amyloidogenic proteins or peptide fragments or proteins related to amyloid fibril formation**

| Amyloidogenic Protein Name                                | Uniprot AC | Source Literature / Source Database                 |                                                                                    |                                                                                                              |                                                                                   |                                                                                         | Fragment | Digital Object Identifier(DOI) |
|-----------------------------------------------------------|------------|-----------------------------------------------------|------------------------------------------------------------------------------------|--------------------------------------------------------------------------------------------------------------|-----------------------------------------------------------------------------------|-----------------------------------------------------------------------------------------|----------|--------------------------------|
|                                                           |            | Sipe, et al. (2014)<br>Amyloid<br>21(4):221-<br>224 | Harisson, et al. (2007)<br>Rev.<br>Physiol.<br>Biochem.<br>Pharmacol.<br>159:1 –77 | Uversky, et al. (1999)<br>Med. Sci.<br>Monit. 5(5):<br>1001-1012 &<br>Med. Sci.<br>Monit. 5(6):<br>1238-1254 | AmyLoad<br>Wozniak &<br>Kotulska (2015)<br>Bioinformatics<br>31(20):3395-<br>3397 | UniProt<br>UniProt<br>Consortium<br>(2015) Nucl.<br>Acids Res.<br>43 (D1):<br>D204-D212 |          |                                |
| 4F2 cell-surface antigen heavy chain                      | P08195     |                                                     |                                                                                    |                                                                                                              | +                                                                                 |                                                                                         | ✓        | no data                        |
| 60 kDa SS-A/Ro ribonucleoprotein                          | P10155     |                                                     |                                                                                    |                                                                                                              | +                                                                                 |                                                                                         | ✓        | no data                        |
| Acetylcholinesterase fragment                             | P22303     |                                                     | +                                                                                  |                                                                                                              |                                                                                   |                                                                                         | ✓        | 10.1021/bi0260334              |
| Actin, cytoplasmic 1, ACTB, Beta-actin                    | P60709     | +                                                   |                                                                                    |                                                                                                              |                                                                                   |                                                                                         |          | no data                        |
| Actin,cytoplasmic 2, ACTG1, Gamma-actin                   | P63261     | +                                                   |                                                                                    |                                                                                                              |                                                                                   |                                                                                         |          | no data                        |
| Acylphosphatase-2                                         | P14621     |                                                     |                                                                                    |                                                                                                              | +                                                                                 |                                                                                         | ✓        | 10.1038/nmeth.1432             |
| alpha beta crystallin (ABC)<br>(Alpha-crystallin B chain) | P02511     |                                                     |                                                                                    |                                                                                                              | +                                                                                 |                                                                                         | ✓        | 10.1126/science.1213151        |
| Alpha-(1,3)-fucosyltransferase 9                          | Q9Y231     |                                                     |                                                                                    |                                                                                                              | +                                                                                 |                                                                                         | ✓        | no data                        |
| Alpha-galactosidase A precursor                           | P06280     |                                                     |                                                                                    |                                                                                                              | +                                                                                 |                                                                                         | ✓        | no data                        |
| alpha-synuclein                                           | P37840     | +                                                   | +                                                                                  | +                                                                                                            |                                                                                   |                                                                                         | ✓        | 10.1042/bst0300559             |
| Alstrom syndrome protein 1                                | Q8TCU4     |                                                     |                                                                                    |                                                                                                              | +                                                                                 |                                                                                         | ✓        | no data                        |
| Aminopeptidase N                                          | P15144     |                                                     |                                                                                    |                                                                                                              | +                                                                                 |                                                                                         | ✓        | 10.1038/nmeth.1432             |
| Amphoterin                                                | P09429     |                                                     | +                                                                                  |                                                                                                              |                                                                                   |                                                                                         | ✓        | 10.1021/bi002095n              |
| Amyloid beta A4 protein                                   | P05067     | +                                                   | +                                                                                  | +                                                                                                            |                                                                                   |                                                                                         | ✓        | 10.1074/jbc.274.18.12619       |
| Androgen receptor protein                                 | P10275     |                                                     | +                                                                                  | +                                                                                                            |                                                                                   |                                                                                         |          | 10.1007/s00109-004-0530-7      |
| Apolipoprotein A-I                                        | P02647     | +                                                   | +                                                                                  | +                                                                                                            |                                                                                   |                                                                                         | ✓        | 10.1074/jbc.M204801200         |

|                                                     |        |   |   |   |   |                                                             |
|-----------------------------------------------------|--------|---|---|---|---|-------------------------------------------------------------|
| <b>Apolipoprotein A-II</b>                          | P02652 | + | + |   | ✓ | 10.1006/geno.2000.6499                                      |
| <b>Apolipoprotein A-IV</b>                          | P06727 | + | + |   |   | 10.1006/bbrc.2001.5260<br>10.1038/labinvest.3700124         |
| <b>Apolipoprotein E</b>                             | P02649 |   |   |   | + | 10.1093/jnen/60.4.342<br>10.1212/01.wnl.0000258354.96336.97 |
| <b>Apolipoprotein C-II</b>                          | P02655 |   |   | + | ✓ | 10.1016/j.jmb.2006.12.040                                   |
| <b>Aquaporin-2</b>                                  | P41181 |   |   | + | ✓ | 10.1038/nmeth.1432                                          |
| <b>Ataxin 1</b>                                     | P54253 |   | + | + |   | PMID: 9342197                                               |
| <b>Ataxin 2</b>                                     | Q99700 |   | + |   |   | 10.1016/S0014-4886(03)00287-5                               |
| <b>Ataxin 3</b>                                     | P54252 |   | + |   |   | 10.1021/bi0352825                                           |
| <b>ATP-binding cassette sub-family A member 12</b>  | Q86UK0 |   |   |   | + | ✓<br>no data                                                |
| <b>Atrophin-1</b>                                   | P54259 |   | + |   |   | PMID: 11037186                                              |
| <b>a-tubulin (Tubulin alpha-1B chain)</b>           | P68363 |   |   |   | + | ✓<br>10.1006/bbrc.1996.0211                                 |
| <b>Bardet-Biedl syndrome 5 protein</b>              | Q8N3I7 |   |   |   | + | ✓<br>10.1038/nmeth.1432                                     |
| <b>Beta-2-microglobulin</b>                         | P61769 | + | + | + | ✓ | 10.1016/S0022-2836(02)01227-5                               |
| <b>Beta-hexosaminidase subunit alpha precursor</b>  | P06865 |   |   |   | + | ✓<br>10.1038/nmeth.1432                                     |
| <b>Bloom syndrome protein</b>                       | P54132 |   |   |   | + | ✓<br>10.1038/nmeth.1432                                     |
| <b>CA150 (Transcription elongation regulator 1)</b> | O14776 |   | + |   |   | ✓<br>10.1073/pnas.0607815103                                |
| <b>CAAX prenyl protease 1 homolog</b>               | O75844 |   |   |   | + | ✓<br>no data                                                |
| <b>Calcitonin</b>                                   | P01258 | + | + | + | ✓ | 10.1074/jbc.M206039200                                      |
| <b>Caspase-3 precursor (subunit p17)</b>            | P42574 |   |   |   | + | ✓<br>10.1038/nmeth.1432                                     |
| <b>Coagulation factor XIII B chain</b>              | P05160 |   | + |   |   | no data                                                     |
| <b>Coagulation factor XIII, A chain</b>             | P00488 |   | + |   |   | no data                                                     |
| <b>Collagen alpha-1</b>                             | Q9BXS0 |   |   |   | + | 10.1093/emboj/21.7.1524<br>10.1074/jbc.M403628200           |
| <b>Corneodesmosin</b>                               | Q15517 | + |   |   |   | no data                                                     |
| <b>Cystatin A</b>                                   | P01040 |   | + |   |   | 10.1002/prot.20041                                          |
| <b>Cystatin B</b>                                   | P04080 |   | + |   |   | 10.1016/S0167-4838(01)00295-3                               |

|                                                                       |        |   |   |   |   |   |                                    |
|-----------------------------------------------------------------------|--------|---|---|---|---|---|------------------------------------|
| <b>Cystatin-C</b>                                                     | P01034 | + | + | + |   |   | 10.1002/prot.20633                 |
| <b>Cystic fibrosis transmembrane conductance regulator</b>            | P13569 |   |   |   | + | ✓ | 10.1038/nmeth.1432                 |
| <b>Disintegrin and metalloproteinase domain-containing protein 10</b> | O14672 |   |   |   |   | + | 10.1093/hmg/ddp323                 |
| <b>DNA mismatch repair protein Mlh3</b>                               | Q9UHC1 |   |   |   | + | ✓ | no data                            |
| <b>Endostatin (Collagen alpha-1(XVIII) chain)</b>                     | P39060 |   | + |   |   | ✓ | 10.1021/bi048510j                  |
| <b>Ferritin heavy chain</b>                                           | P02794 | + |   |   |   |   | no data                            |
| <b>Ferritin light chain</b>                                           | P02792 | + |   |   |   |   | 10.1212/01.wnl.0000178224.81169.c2 |
| <b>Fibrinogen alpha chain</b>                                         | P02671 | + | + |   |   |   | 10.1038/ng0393-252                 |
| <b>Galectin 7</b>                                                     | P47929 | + |   |   |   |   | no data                            |
| <b>Gamma-aminobutyric acid receptor subunit beta-1 precursor</b>      | P18505 |   |   |   | + | ✓ | no data                            |
| <b>Gelsolin</b>                                                       | P06396 | + | + | + |   | ✓ | PMID: 14640038                     |
| <b>Glycophorin A</b>                                                  | P02724 |   | + |   |   | ✓ | 10.1021/bi047827g                  |
| <b>G-protein coupled receptor 20</b>                                  | Q99678 |   |   |   | + | ✓ | no data                            |
| <b>GRB2-associated-binding protein 1</b>                              | Q13480 |   |   |   | + | ✓ | no data                            |
| <b>Growth/differentiation factor 3 precursor</b>                      | Q9NR23 |   |   |   | + | ✓ | no data                            |
| <b>Guanine nucleotide-binding protein subunit beta-5</b>              | O14775 |   |   |   | + | ✓ | no data                            |
| <b>Histone-lysine N-methyltransferase 2C</b>                          | Q8NEZ4 |   |   |   | + | ✓ | no data                            |
| <b>Homeobox protein DLX-3</b>                                         | O60479 |   |   |   | + | ✓ | no data                            |
| <b>Huntingtin (Polyq expanded)</b>                                    | P42858 | + | + | + |   |   | 10.1016/S0896-6273(02)00872-3      |
| <b>Ig gamma-1 chain C region (Immunoglobulin Heavy Chain)</b>         | P01857 | + | + |   |   |   | PMID: 2118650                      |
| <b>Ig kappa chain C region (Immunoglobulin Light Chain)</b>           | P01834 | + | + | + |   | ✓ | 10.1074/jbc.M207225200             |
| <b>Ig kappa chain V-I region BAN</b>                                  | P04430 |   |   |   |   | + | no data                            |
| <b>Ig kappa chain V-II region TEW</b>                                 | P01617 |   |   |   |   | + |                                    |
| <b>Ig lambda chain V-I region EPS</b>                                 | P06888 |   |   |   |   | + | no data                            |

|                                                          |        |   |   |   |  |   |   |                                                        |
|----------------------------------------------------------|--------|---|---|---|--|---|---|--------------------------------------------------------|
| <b>Ig lambda chain V-II region NIG-84</b>                | P04209 |   |   |   |  | + |   |                                                        |
| <b>Ig lambda chain V-IV region MOL</b>                   | P06889 |   |   |   |  |   | + | no data                                                |
| <b>Ig lambda chain V-VI region AR</b>                    | P01721 |   |   |   |  |   | + |                                                        |
| <b>Inner nuclear membrane protein Man1</b>               | Q9Y2U8 |   |   |   |  | + |   | ✓<br>no data                                           |
| <b>Insulin</b>                                           | P01308 | + | + |   |  |   |   | PMID: 6337294<br>10.4103/2230-8210.146879              |
| <b>Integral membrane protein 2B</b>                      | Q9Y287 | + | + |   |  |   |   | ✓<br>10.1042/BST20051111                               |
| <b>Integrin alpha-8 precursor (extracellular domain)</b> | P53708 |   |   |   |  | + |   | ✓<br>no data                                           |
| <b>Interleukin-31 receptor subunit alpha</b>             | Q8NI17 |   |   |   |  |   | + | 10.1038/ejhg.2009.135                                  |
| <b>Islet amyloid polypeptide</b>                         | P10997 | + | + | + |  |   |   | ✓<br>10.1006/jmbi.1999.3422                            |
| <b>Kerato-epithelin</b>                                  | Q15582 | + | + |   |  |   |   | PMID: 9799082                                          |
| <b>Kv channel-interacting protein 1</b>                  | Q9NZI2 |   |   |   |  | + |   | ✓<br>no data                                           |
| <b>Lactadherin</b>                                       | Q08431 | + | + |   |  |   |   | ✓<br>10.1073/pnas.96.15.8669                           |
| <b>Lactoferrin</b>                                       | P02788 | + | + |   |  |   |   | ✓<br>10.1021/bi0204746                                 |
| <b>Leukocyte cell-derived chemotaxin-2</b>               | O14960 | + |   |   |  |   |   | no data                                                |
| <b>Low-density lipoprotein receptor precursor</b>        | P01130 |   |   |   |  | + |   | ✓<br>no data                                           |
| <b>Lysozyme C</b>                                        | P61626 | + | + | + |  |   |   | 10.1002/humu.9393                                      |
| <b>Major prion protein</b>                               | P04156 | + | + | + |  |   |   | ✓<br>PMID: 1438300<br>10.1046/j.1471-4159.2003.01664.x |
| <b>NACHT, LRR and PYD domains-containing protein 3</b>   | Q96P20 |   |   |   |  |   | + | 10.1002/art.10509                                      |
| <b>NADH-ubiquinone oxidoreductase chain 1</b>            | P03886 |   |   |   |  |   | + | 10.1006/geno.1993.1299                                 |
| <b>NADH-ubiquinone oxidoreductase chain 2</b>            | P03891 |   |   |   |  |   | + | 10.1016/S0006-291X(05)80136-6                          |
| <b>Natriuretic peptides A</b>                            | P01160 | + | + |   |  |   |   | 10.1016/S0006-291X(87)80243-7                          |
| <b>Neuroserpin</b>                                       | Q99574 | + |   |   |  |   |   | 10.1038/43894                                          |
| <b>Nucleophosmin</b>                                     | P06748 |   |   |   |  | + |   | ✓<br>10.1096/fj.14-269522                              |
| <b>Odontogenic ameloblast-associated protein</b>         | A1E959 | + | + |   |  |   |   | ✓<br>10.1042/BST20051111                               |

|                                                                |        |  |   |   |   |   |   |                                                    |
|----------------------------------------------------------------|--------|--|---|---|---|---|---|----------------------------------------------------|
| <b>Oncostatin-M-specific receptor subunit beta</b>             | Q99650 |  |   |   | + |   |   | 10.1016/j.ajhg.2007.09.002                         |
| <b>Origin recognition complex subunit 3</b>                    | Q9UBD5 |  |   |   |   | + | ✓ | no data                                            |
| <b>Otoferlin</b>                                               | Q9HC10 |  |   |   |   | + | ✓ | no data                                            |
| <b>P21-ras (GTPase HRas )</b>                                  | P01112 |  |   |   |   | + | ✓ | PMID: 7723021                                      |
| <b>p53</b>                                                     | P04637 |  |   |   |   |   |   | 10.1016/S0022-2836(03)00175-X                      |
| <b>Phosphatidylinositol 3-kinase regulatory subunit alpha</b>  | P27986 |  |   |   |   | + | ✓ | 10.1038/nmeth.1432                                 |
| <b>Plasminogen activator inhibitor 1 precursor</b>             | P05121 |  |   |   |   | + | ✓ | 10.1038/nmeth.1432                                 |
| <b>Polyadenine-binding protein 2</b>                           | Q86U42 |  |   |   |   |   |   | 10.1159/000072861                                  |
| <b>Polycystin-1 precursor</b>                                  | P98161 |  |   |   |   | + | ✓ | 10.1038/nmeth.1432                                 |
| <b>Polypeptide N-acetylgalactosaminyltransferase 1</b>         | Q10472 |  |   |   |   | + | ✓ | no data                                            |
| <b>POU domain, class 2 transcription factor 1</b>              | P14859 |  |   |   |   | + | ✓ | 10.1038/nmeth.1432                                 |
| <b>Presenilin 1</b>                                            | P49768 |  |   |   |   |   | ✓ | 10.1006/bbrc.1997.6336                             |
| <b>presenilin 2</b>                                            | P49810 |  |   |   |   |   | ✓ | 10.1006/bbrc.1997.6336                             |
| <b>Prion-like protein doppel</b>                               | Q9UKY0 |  |   |   |   |   |   | no data                                            |
| <b>Procarboxypeptidase A2 activation domain</b>                | P48052 |  |   |   |   |   | ✓ | 10.1042/bj20030368                                 |
| <b>Prolactin</b>                                               | P01236 |  | + | + |   |   | ✓ | PMID: 9006323                                      |
| <b>Proprotein convertase subtilisin/kexin type 6 precursor</b> | P29122 |  |   |   |   | + | ✓ | no data                                            |
| <b>Prosaposin receptor GPR37 precursor</b>                     | O15354 |  |   |   |   | + | ✓ | no data                                            |
| <b>Prostatic acid phosphatase</b>                              | P15309 |  |   |   |   |   | ✓ | 10.1016/j.cell.2007.10.014<br>10.1128/JVI.00268-09 |
| <b>Protein unc-13 homolog B</b>                                | O14795 |  |   |   |   | + | ✓ | no data                                            |
| <b>Protocadherin beta-2 precursor</b>                          | Q9Y5E7 |  |   |   |   | + | ✓ | 10.1038/nmeth.1432                                 |
| <b>Protocadherin-15 precursor</b>                              | Q96QU1 |  |   |   |   | + | ✓ | no data                                            |
| <b>Pulmonary surfactant-associated protein C</b>               | P11686 |  | + | + |   |   | ✓ | 10.1056/NEJMra023226                               |
| <b>Putative BPIFA4P protein precursor</b>                      | Q86YQ2 |  |   |   |   | + | ✓ | no data                                            |

|                                                                                  |        |   |   |   |   |   |   |                                                    |
|----------------------------------------------------------------------------------|--------|---|---|---|---|---|---|----------------------------------------------------|
| <b>Pyrin</b>                                                                     | O15553 |   |   |   | + |   |   | 10.1038/sj.ejhg.5200303                            |
| <b>Relaxin receptor 2</b>                                                        | Q8WXD0 |   |   |   | + |   | ✓ | 10.1038/nmeth.1432                                 |
| <b>Ribose-5-phosphate isomerase</b>                                              | P49247 |   |   |   | + |   | ✓ | no data                                            |
| <b>RNA-binding protein FUS</b>                                                   | P35637 |   |   |   | + |   | ✓ |                                                    |
| <b>RNA-binding protein Musashi homolog 1</b>                                     | O43347 |   |   |   | + |   | ✓ | no data                                            |
| <b>Rod cGMP-specific 3', 5'-cyclic phosphodiesterase subunit alpha precursor</b> | P16499 |   |   |   | + |   | ✓ | no data                                            |
| <b>Semenogelin-1</b>                                                             | P04279 | + | + |   |   |   | ✓ | PMID: 15962837                                     |
| <b>Serine/threonine-protein phosphatase 5</b>                                    | P53041 |   |   |   |   | + | ✓ | 10.1074/jbc.M410775200                             |
| <b>Serum amyloid A-1</b>                                                         | P0DJI8 | + | + | + |   |   | ✓ | 10.1016/S0006-291X(05)80107-X                      |
| <b>Serum amyloid A-2</b>                                                         | P0DJI9 | + | + | + |   |   | ✓ | 10.1016/S0006-291X(05)80107-X                      |
| <b>Serum amyloid P-component</b>                                                 | P02743 |   |   |   |   | + |   | PMID: 4055725                                      |
| <b>Shadow of prion protein</b>                                                   | Q5BIV9 |   |   |   |   | + |   | no data                                            |
| <b>SLIT and NTRK-like protein 5 precursor</b>                                    | O94991 |   |   |   | + |   | ✓ | no data                                            |
| <b>Sortilin-related receptor</b>                                                 | Q92673 |   |   |   |   | + |   | 10.1126/scitranslmed.3007747<br>10.1038/mp.2012.15 |
| <b>Spectrin SH3 (Spectrin alpha chain, non-erythrocytic 1)</b>                   | Q13813 |   |   |   | + |   | ✓ | 10.1006/jmbi.1996.0042                             |
| <b>Splicing factor 3A subunit 2</b>                                              | Q15428 |   |   |   | + |   | ✓ | no data                                            |
| <b>Superoxide dismutase 1</b>                                                    | P00441 |   | + |   |   |   |   | 10.1038/362059a0                                   |
| <b>TAR DNA-binding protein 43</b>                                                | Q13148 |   |   |   | + |   | ✓ |                                                    |
| <b>Taste receptor type 2 member 5</b>                                            | Q9NYW4 |   |   |   | + |   | ✓ | 10.1038/nmeth.1432                                 |
| <b>TATA-box binding protein</b>                                                  | P20226 |   | + |   |   |   |   | 10.1093/hmg/10.14.1441                             |
| <b>Tau</b>                                                                       | P10636 | + | + | + |   |   | ✓ | 10.1074/jbc.M402379200                             |
| <b>Titin</b>                                                                     | Q8WZ42 |   |   |   | + |   | ✓ | 10.1038/nmeth.1432                                 |
| <b>Transportin-1</b>                                                             | Q92973 |   |   |   | + |   | ✓ | 10.1038/nmeth.1432                                 |

|                                                                      |        |   |   |   |   |   |                         |
|----------------------------------------------------------------------|--------|---|---|---|---|---|-------------------------|
| <b>Transthyretin</b>                                                 | P02766 | + | + | + |   |   | 10.1007/PL00000791      |
| <b>Tumor necrosis factor receptor superfamily member 1A</b>          | P19438 |   |   |   |   | + | 10.1086/321976          |
| <b>Tumor-associated calcium signal transducer 2</b>                  | P09758 |   |   |   |   | + | 10.1038/7759            |
| <b>Tyrosine-protein kinase Mer precursor</b>                         | Q12866 |   |   |   | + |   | ✓<br>no data            |
| <b>Tyrosine-protein kinase transmembrane receptor ROR2 precursor</b> | Q01974 |   |   |   | + |   | ✓<br>no data            |
| <b>Unconventional myosin-XV</b>                                      | Q9UKN7 |   |   |   | + |   | ✓<br>10.1038/nmeth.1432 |
| <b>YLP motif-containing protein 1</b>                                | P49750 |   |   |   | + |   | ✓<br>10.1038/nmeth.1432 |
| <b>α1 Anti-trypsin C-terminal peptides</b>                           | P01009 |   | + |   |   |   | ✓<br>PMID: 7576238      |
| <b>α1A voltage-dependent calcium channel subunit</b>                 | O00555 |   | + |   |   |   | 10.1159/000072849       |

AC, Accession;

\*Protein Names were extracted from UniProt
