# Supplementary material for: The amyloid interactome: Exploring protein aggregation
Source: PubMed Central journal article supplement (PMC5383009; doi:10.1371/journal.pone.0173163), 2017-03-01
Supplement: pone.0173163.s006.pdf [file pone.0173163.s006.pdf]

**S2 Table. The top 20 hubs of the amyloid interactome.**

| <b>Protein names*</b>                                      | <b>Degree</b> |
|------------------------------------------------------------|---------------|
| <b>Amyloid beta A4 protein</b>                             | <b>84</b>     |
| <b>Apolipoprotein A-I</b>                                  | <b>61</b>     |
| <b>Major prion protein</b>                                 | <b>57</b>     |
| Transcription factor AP-1                                  | 53            |
| <b>Transthyretin</b>                                       | <b>47</b>     |
| Epidermal growth factor receptor                           | 40            |
| 14-3-3 protein zeta/delta                                  | 40            |
| Growth factor receptor-bound protein 2                     | 35            |
| Gamma-aminobutyric acid receptor-associated protein-like 1 | 33            |
| Serum albumin                                              | 33            |
| Gamma-aminobutyric acid receptor-associated protein-like 2 | 33            |
| NF-kappa-B essential modulator                             | 29            |
| Fibronectin                                                | 26            |
| Vimentin                                                   | 25            |
| Heat shock cognate 71 kDa protein                          | 24            |
| Beta-arrestin-1                                            | 23            |
| Myosin-9                                                   | 23            |
| Hsp90 co-chaperone Cdc37                                   | 23            |
| <b>Beta-2-microglobulin</b>                                | <b>23</b>     |
| Actin, cytoplasmic 1                                       | 22            |

Amyloidogenic proteins are highlighted in bold.

\*Protein nomenclature follows the most cited abbreviations in literature.
