# Supplementary material for: The amyloid interactome: Exploring protein aggregation
Source: PubMed Central journal article supplement (PMC5383009; doi:10.1371/journal.pone.0173163), 2017-03-01
Supplement: pone.0173163.s007.pdf [file pone.0173163.s007.pdf]

**S3 Table. The top 20 bottlenecks of the amyloid interactome.**

| <b>Protein names</b>                                       | <b>Betweenness Centrality</b> |
|------------------------------------------------------------|-------------------------------|
| <b>Amyloid beta A4 protein</b>                             | <b>0.26989904</b>             |
| <b>Apolipoprotein A-I</b>                                  | <b>0.18986417</b>             |
| <b>Major prion protein</b>                                 | <b>0.18065884</b>             |
| <b>Transthyretin</b>                                       | <b>0.10686298</b>             |
| Transcription factor AP-1                                  | 0.08605723                    |
| <b>Beta-2-microglobulin</b>                                | <b>0.07022626</b>             |
| Serum albumin                                              | 0.0484804                     |
| Large proline-rich protein BAG6                            | 0.0446524                     |
| Growth factor receptor-bound protein 2                     | 0.04446241                    |
| Epidermal growth factor receptor                           | 0.04438062                    |
| Fibronectin                                                | 0.03676366                    |
| <b>Lysozyme C</b>                                          | <b>0.0286479</b>              |
| NF-kappa-B essential modulator                             | 0.02801342                    |
| 14-3-3 protein zeta/delta                                  | 0.02671415                    |
| Hsp90 co-chaperone Cdc37                                   | 0.02489765                    |
| Gamma-aminobutyric acid receptor-associated protein-like 2 | 0.02366865                    |
| Peptidyl-prolyl cis-trans isomerase NIMA-interacting 1     | 0.02137914                    |
| Myc proto-oncogene protein                                 | 0.02129564                    |
| Gamma-aminobutyric acid receptor-associated protein-like 1 | 0.02022756                    |
| Mitogen-activated protein kinase 6                         | 0.01801841                    |

Amyloidogenic proteins are highlighted in bold.

\*Protein nomenclature follows the most cited abbreviations in literature.
