# Supplementary material for: The amyloid interactome: Exploring protein aggregation
Source: PubMed Central journal article supplement (PMC5383009; doi:10.1371/journal.pone.0173163), 2017-03-01
Supplement: pone.0173163.s009.pdf [file pone.0173163.s009.pdf]

**S5 Table. GO Terms enrichment of the 18 important, non-amyloidogenic hubs and bottlenecks, identified on the Amyloid Interactome.**

| Protein names*                                             | Uniprot AC | GO Term              |           |                   |                    |                     |
|------------------------------------------------------------|------------|----------------------|-----------|-------------------|--------------------|---------------------|
|                                                            |            | Molecular Chaperones | Autophagy | Metabolic Process | Response to Stress | Signal Transduction |
| 14-3-3 protein zeta/delta                                  | P63104     |                      |           |                   | ✓                  | ✓                   |
| Beta-arrestin-1                                            | P49407     |                      |           | ✓                 | ✓                  | ✓                   |
| Epidermal growth factor receptor                           | P00533     |                      |           | ✓                 | ✓                  | ✓                   |
| Fibronectin                                                | P02751     |                      |           | ✓                 | ✓                  |                     |
| Gamma-aminobutyric acid receptor-associated protein-like 1 | Q9H0R8     |                      | ✓         |                   | ✓                  |                     |
| Gamma-aminobutyric acid receptor-associated protein-like 2 | P60520     |                      | ✓         |                   | ✓                  |                     |
| Growth factor receptor-bound protein 2                     | P62993     |                      |           | ✓                 | ✓                  | ✓                   |
| Heat shock cognate 71 kDa protein                          | P11142     | ✓                    | ✓         | ✓                 | ✓                  | ✓                   |
| Hsp90 co-chaperone Cdc37                                   | Q16543     | ✓                    | ✓         | ✓                 | ✓                  | ✓                   |
| Large proline-rich protein BAG6                            | P46379     | ✓                    |           | ✓                 | ✓                  | ✓                   |
| Mitogen-activated protein kinase 6                         | Q16659     |                      |           | ✓                 |                    | ✓                   |
| Myc proto-oncogene protein                                 | P01106     |                      |           | ✓                 | ✓                  | ✓                   |
| Myosin-9                                                   | P35579     |                      |           | ✓                 | ✓                  | ✓                   |
| NF-kappa-B essential modulator                             | Q9Y6K9     |                      |           | ✓                 | ✓                  | ✓                   |
| Peptidyl-prolyl cis-trans isomerase NIMA-interacting 1     | Q13526     |                      |           | ✓                 |                    |                     |
| Serum albumin                                              | P02768     |                      |           | ✓                 | ✓                  | ✓                   |
| Transcription factor AP-1                                  | P05412     |                      |           | ✓                 | ✓                  | ✓                   |
| Vimentin                                                   | P08670     |                      |           |                   |                    | ✓                   |

**GO, Gene Ontology; AC, Accession;**

**\*Protein Names were extracted from UniProt**
