# Supplementary material for: The amyloid interactome: Exploring protein aggregation
Source: PubMed Central journal article supplement (PMC5383009; doi:10.1371/journal.pone.0173163), 2017-03-01
Supplement: pone.0173163.s011.pdf [file pone.0173163.s011.pdf]

# S1 File

## Web application User guide

([http://83.212.109.111/amyloid\\_interactome](http://83.212.109.111/amyloid_interactome))

In order to create an interactive network visualization, **Cytoscape.js** was used. Cytoscape.js, a graph theory library, allows for the display and manipulation of rich, interactive graphs such as the amyloid interactome. For more details please refer to Fig 1 and 2 of the main manuscript and S2 Fig on the Supporting Information Field.

In the main window the user can see the entire network and “interact” with it.

Drop down network list

Show/hide toolbar

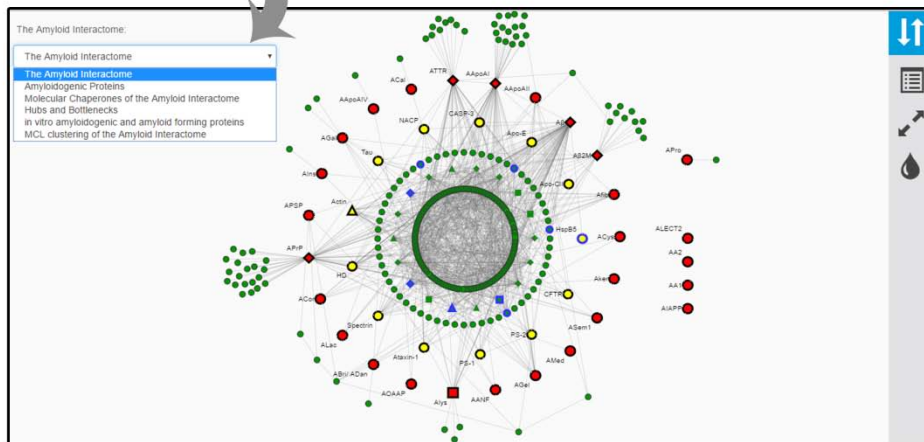

The Amyloid Interactome:

The Amyloid Interactome

The Amyloid Interactome

Amyloidogenic Proteins

Molecular Chaperones of the Amyloid Interactome

Hubs and Bottlenecks

in vitro amyloidogenic and amyloid forming proteins

MCL clustering of the Amyloid Interactome

The user is allowed to select between the different networks described in the main manuscript: Fig 1 (**Amyloid Interactome**), S2 Fig (**Amyloidogenic proteins, *in vitro* amyloidogenic and amyloid forming proteins, Hubs and Bottlenecks, Molecular Chaperones of the Amyloid Interactome**) and the clustered network of

Fig 2 (**MCL clustering of the Amyloid Interactome**), using the drop network list on the upper left corner of the window as shown above.

A button on the upper right corner of the screen allows the user to **show/hide the toolbar** of the application. Among the available functions, the **fit to window** button lets the user to adjust the network to its original position whereas the background colour allows the change of the network's background appearance.

Important information can be gathered from the Table Pane where the user can see all relevant information regarding selected nodes and edges, as they are deposited in the MITAB2.5 file in Intact, from where the interactions were gathered.

Specifically, the **Node Table** contains **unique identifiers** for each node (usually the UniProtKB AC), **Alternative Identifiers** for proteins (e.g. Gene Names), **Aliases** in various databases, the **NCBI Taxonomy identifier** and a column with the **Recommended UniprotKB Protein Name**. For **amyloidogenic proteins** a column with **abbreviations**, used in the main manuscript, is given, and columns indicating whether a protein is a **hub and/or bottleneck**, as well as, a column to discern between *in vivo* and *in vitro* and **amyloid forming** nodes. Part of the Node Table is shown below.

| Node |      |                  |                |                                                                                                      |                     |                                                                                                      |                                                                                                |
|------|------|------------------|----------------|------------------------------------------------------------------------------------------------------|---------------------|------------------------------------------------------------------------------------------------------|------------------------------------------------------------------------------------------------|
| SUID | id   | in_vivo_in_vitro | Hub_Bottleneck | Alias_es_interactor_A                                                                                | isExcludedFromPaths | Alias_es_interactor_B                                                                                | Alt_ID_s_interactor                                                                            |
| 1637 | 1637 | in_vivo          | hub+bottleneck | psi-mi:a4_human(display_long)  Alzheimer disease amyloid protein(gene name synonym)  ABPP(gene name) | false               | psi-mi:a4_human(display_long)  Alzheimer disease amyloid protein(gene name synonym)  ABPP(gene name) | intact:EBI-77613 Q8G5Q8 WZ99 Q8UC33 Q948 Q8UCD1 Q8UC58 Q111 Q16014 Q16019 Q16020 Q16021 Q8UC16 |

The **Edge Table** contains **unique identifiers** for each edge, the **Interaction detection method**, the **First author** of the publication and **Identifier** of the publication in which this interaction has been detected, the **Interaction type(s)**, the **Source databases and identifiers**, the **Interaction identifier(s)** in the corresponding source database and a **confidence score** for each interaction. Part of the Edge Table is shown below.

| Edge                                 |                     |                                            |                                                        |                          |                               |                          |                                                        |
|--------------------------------------|---------------------|--------------------------------------------|--------------------------------------------------------|--------------------------|-------------------------------|--------------------------|--------------------------------------------------------|
| shared_interaction                   | Confidence_value_s  | Interaction_detection_method_s             | shared_name                                            | Publication_1st_author_s | Publication_Identifier_s      | Source_database_s        | name                                                   |
| psi-mi:"MI:0407"(direct interaction) | intact-miscore:0.41 | psi-mi:"MI:0813"(proximity ligation assay) | P01236 (psi-mi:"MI:0407"(direct interaction)) P16471-7 | Fleming et al. (2013)    | imex:IM-20982 pubmed:23048206 | psi-mi:"MI:0469"(IntAct) | P01236 (psi-mi:"MI:0407"(direct interaction)) P16471-7 |
